# Supplementary material for: Cherry juice alleviates high-fat diet-induced obesity in C57BL/6J mice by resolving gut microbiota dysbiosis and regulating microRNA
Source: Royal Society of Chemistry journal article supplement (doi:10.1039/d2fo03023c), 2023-01-01
Supplement: d2fo03023c1.pdf [file d2fo03023c1.pdf]

## Supporting Information

Table S1 Primer sequences of RT-qPCR amplification

| Gene        | Forward primer           | Reverse primer       |
|-------------|--------------------------|----------------------|
| miR-27a-5p  | AGGGCTTAGCTGCTTGTGAGCA   | GTGCAGGGTCCGAGGTATTC |
| miR-27b-3p  | TTCACAGTGGCTAAGTTCCGC    | GTGCAGGGTCCGAGGTATTC |
| miR-146a-5p | TGAGAACTGAATTCCATGGGTT   | GTGCAGGGTCCGAGGTATTC |
| miR-378a-3p | ACTGGACTTGGAGTCAGAAGG    | GTGCAGGGTCCGAGGTATTC |
| miR-155a    | TTAATGCTAATTGTGATAGGGGT  | GTGCAGGGTCCGAGGTATTC |
| miR-223-3p  | TGTCAGTTTGTCAAATACCCCA   | GTGCAGGGTCCGAGGTATTC |
| miR-132-3p  | TAACAGTCTACAGCCATGGTCG   | GTGCAGGGTCCGAGGTATTC |
| miR-200c-3p | TAATACTGCCGGGTAATGATGGA  | GTGCAGGGTCCGAGGTATTC |
| miR-181a    | AACATTCAACGCTGTCCGGTGAGT | GTGCAGGGTCCGAGGTATTC |
| miR-125a    | TCCCTGAGACCCTTTAACCTGTGA | GTGCAGGGTCCGAGGTATTC |
| U6          | CGCAAGGATGACACGCAAAT     | GGTGCAGGGTCCGAGGTAT  |

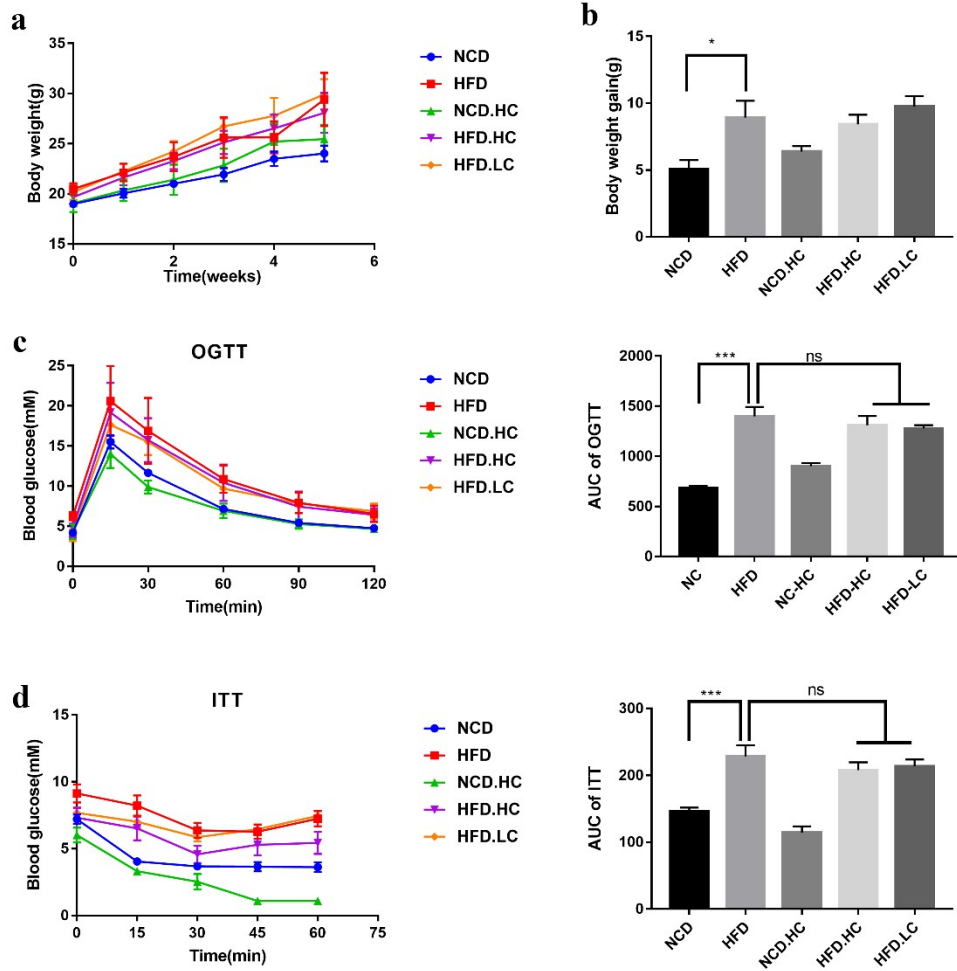

Figure S1. Successful establishment of mouse obesity model. (a) Body weight changes (n = 6); (b) body weight gain (n = 5); (c) oral glucose tolerance test (OGTT) and Area Under Curve (AUC) of OGTT (n = 6); (d) insulin tolerance test (ITT) and AUC of ITT (n = 5-6). Data are shown as means  $\pm$  SEM. Statistical analyses were performed using one-way ANOVA test; \* $p < 0.05$ ; \*\* $p < 0.01$ ; \*\*\* $p < 0.001$ ; ns, not significant.

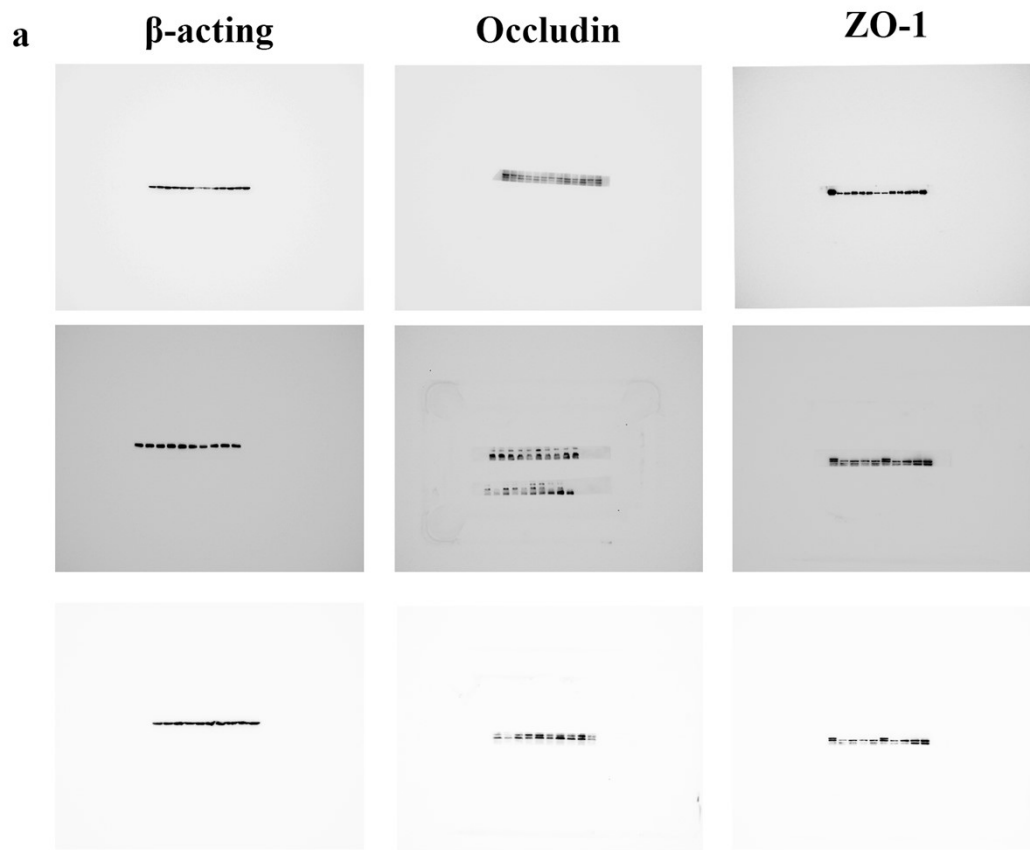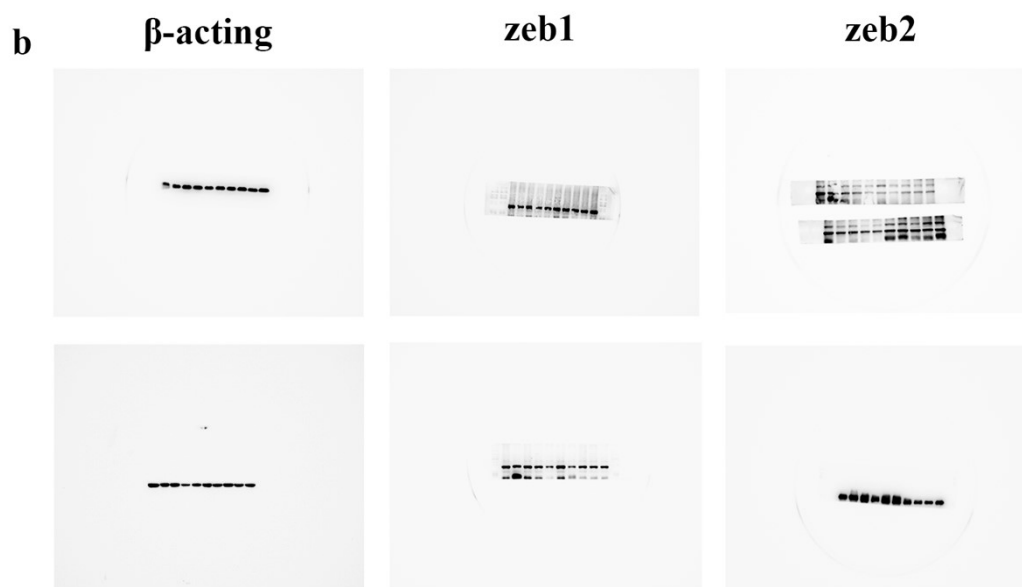

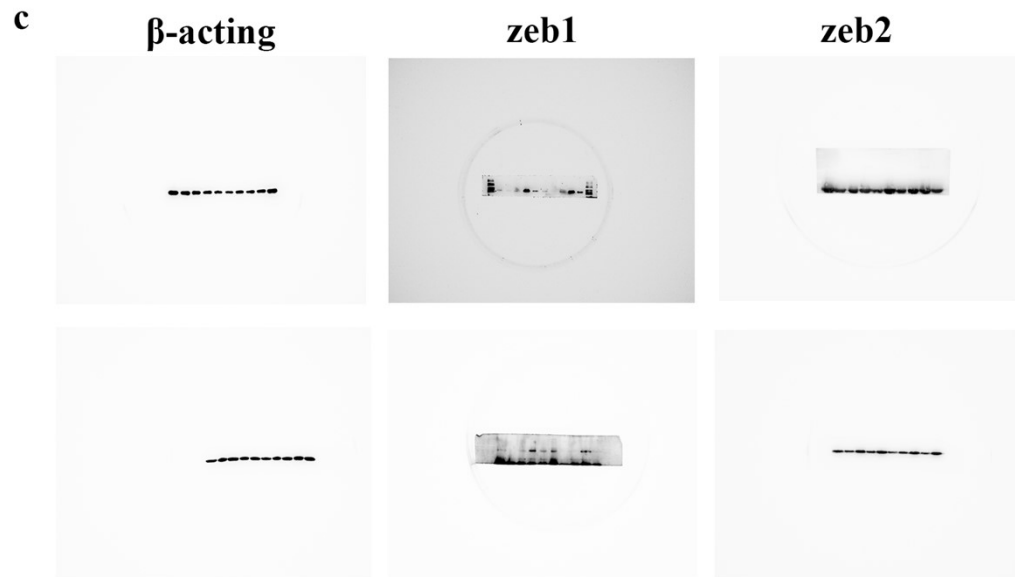

Figure S2. Raw immunoblots: (a)western blot analysis of intestinal tight junction proteins in colon; (b)western blot analysis of microRNA-associated proteins in colon; (c)western blot analysis of microRNA-associated proteins in iWAT.

note:The groups of each graph from left to right are NCD, HFD, NCD.HC, HFD.HC, HFD. LC, NCD, HFD, NCD.HC, HFD.HC, HFD.LC.

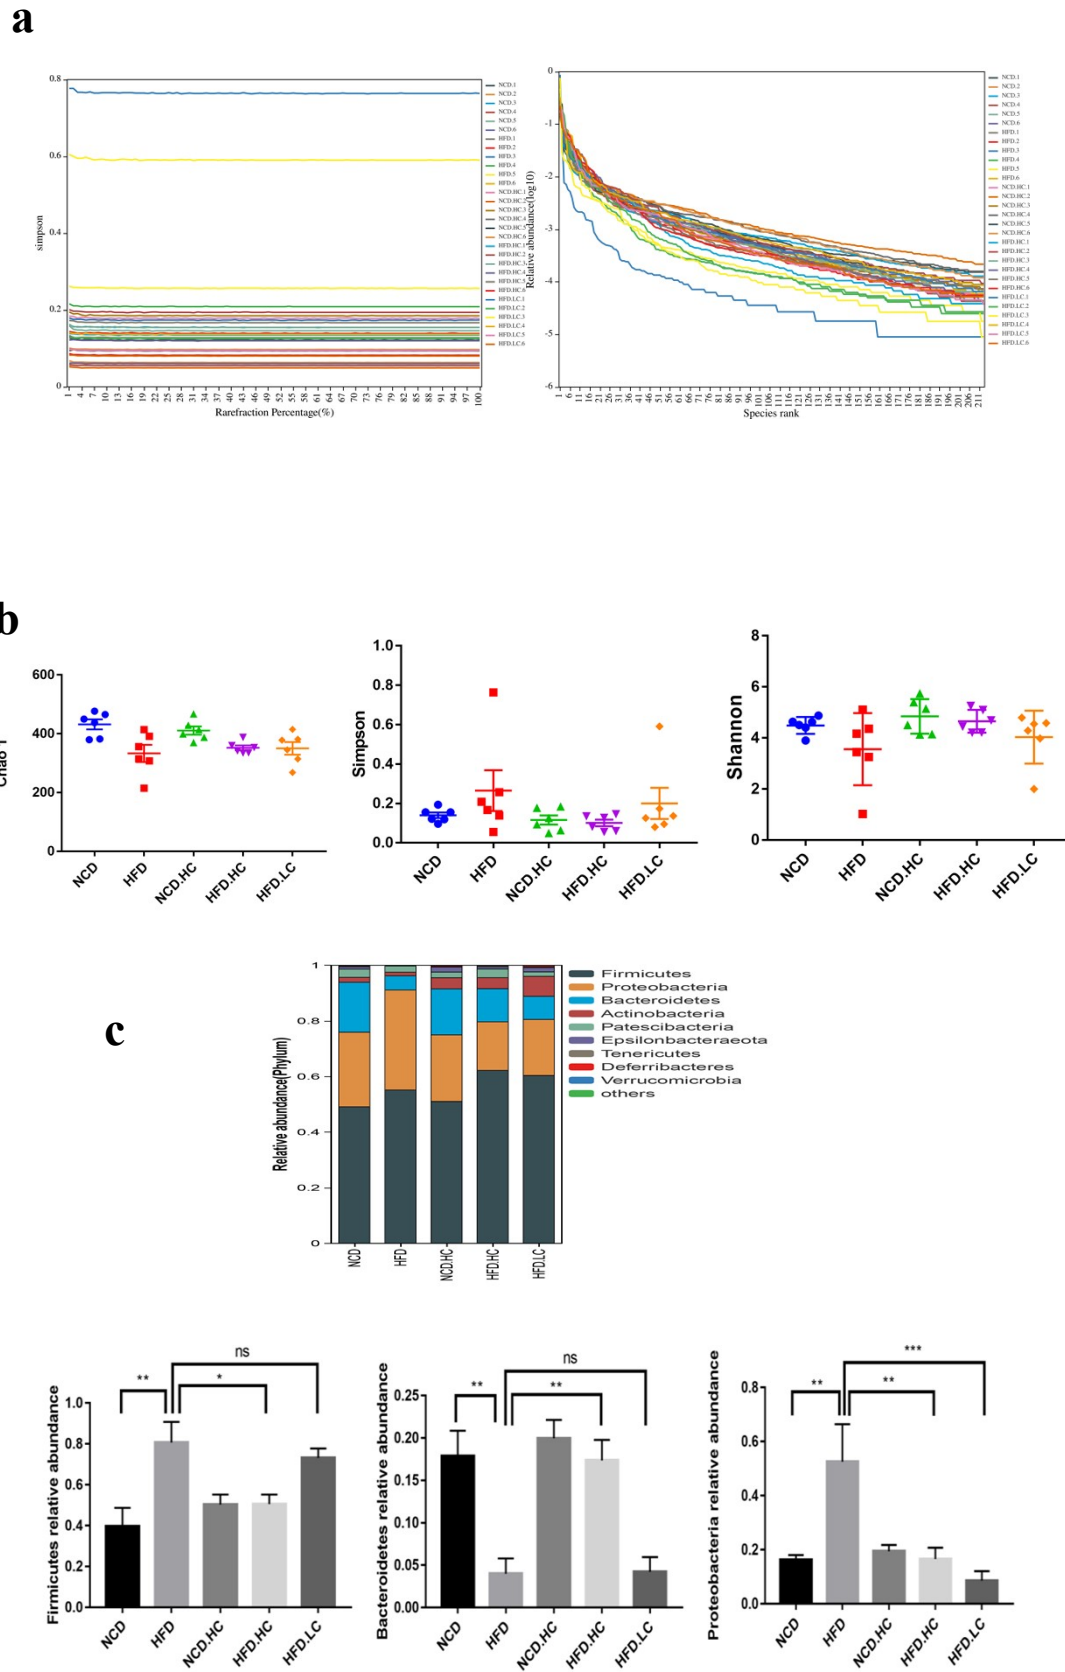

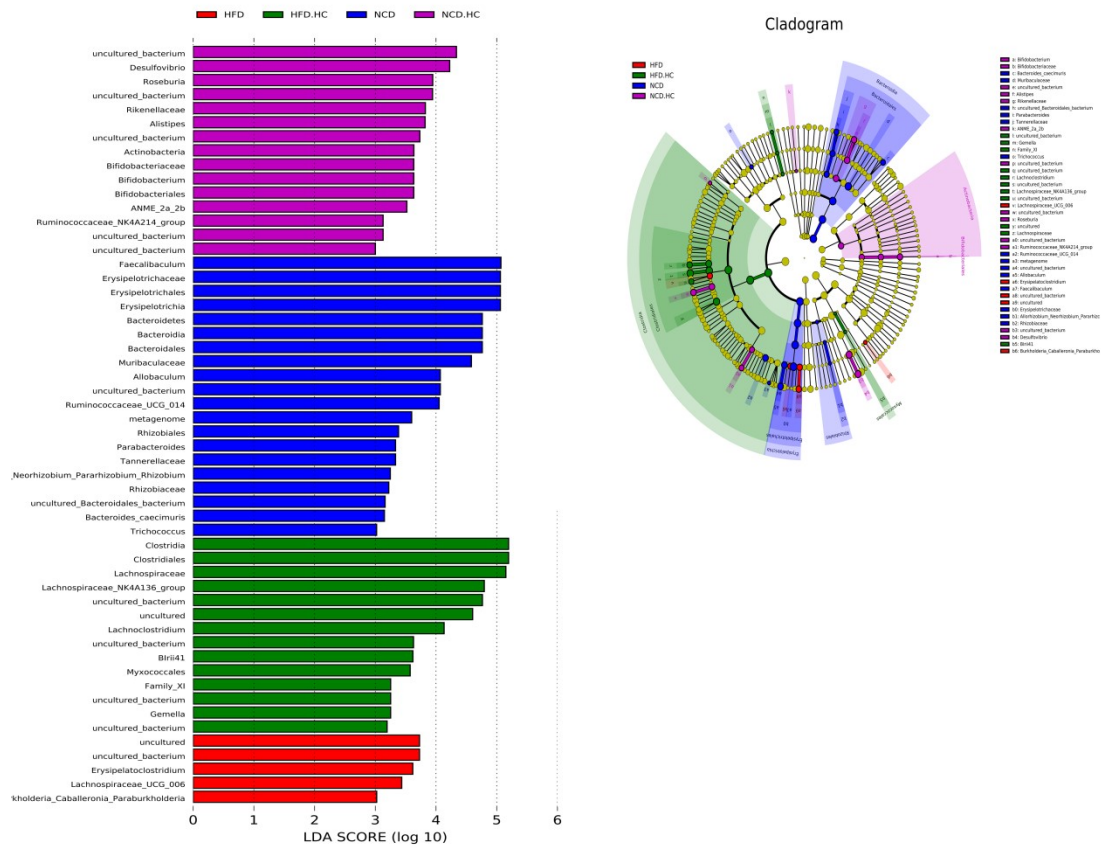

Figure S4. Comparison of gut microbiota LefSe analysis among different groups. LDA scores and cladogram generated from LefSe analysis for NCD, HFD, NCD-HC, and HFD-HC groups (Kruskal-Wallis test, LDA > 2.0,  $p < 0.05$ )

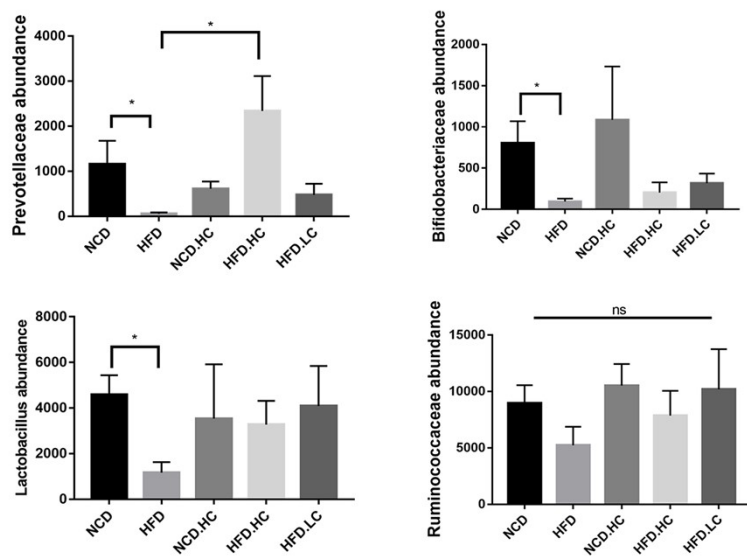

Figure S5. The abundance differences in bacteria producing SCFAs among the different groups. Data are means  $\pm$  SEM. \* $p < 0.05$ , \*\* $p < 0.01$ , \*\*\* $p < 0.001$

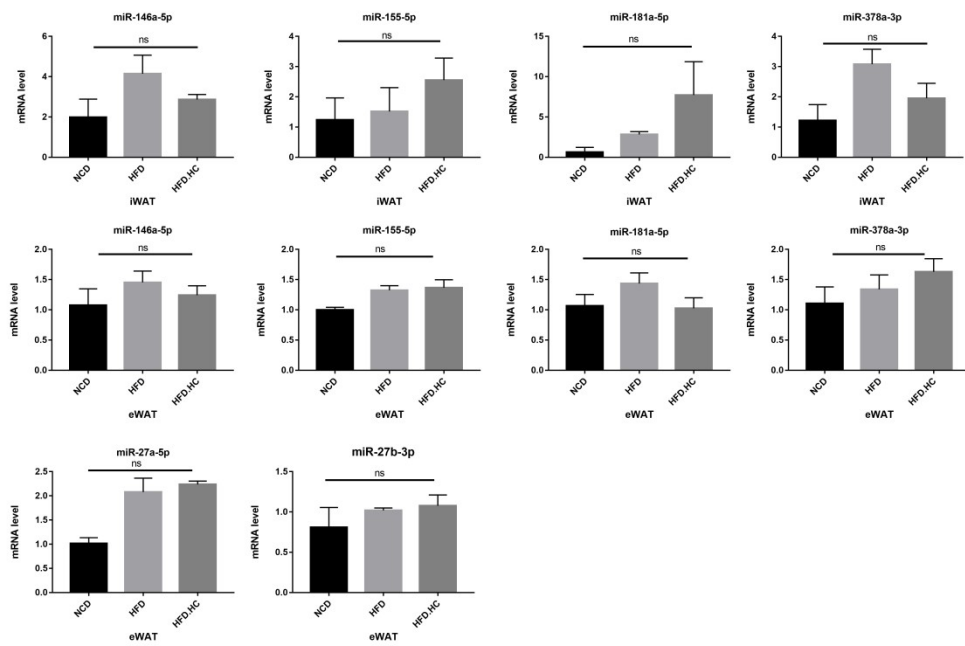

Figure S6. microRNAs analysis in eWAT and iWAT of obese mice (n = 5-6). Data are shown as means  $\pm$  SEM. Statistical analyses were performed using one-way ANOVA test; \* $p < 0.05$ ; \*\* $p < 0.01$ ; \*\*\* $p < 0.001$ ; ns, not significant.
